# Supplementary material
Source: publisher site journal article supplement (https://www.dovepress.com/article/542980)
Supplement: Supplementary file 1 [file Supplementary%20Materials.docx]

Supplementary Material

**Supplementary Table 1: Search strategies**

**Supplementary Table 2: Included articles in this review (n=41)**

**Supplementary Table 1: Search strategies**

| 1. Pubmed | | |
| --- | --- | --- |
| #1 | Search "Caregivers"[MeSH Terms] | |
| #2 | Search "Dementia"[MeSH Terms] | |
| #3 | Search (((((caregiv*[Title/Abstract]))OR (carer*[Title/Abstract])) OR (caring[Title/Abstract])) OR (caretaker[Title/Abstract])) OR (caregiver*[Title/Abstract]) | |
| #4 | Search (dement*[Title/Abstract]) OR (alzheimer*[Title/Abstract]) | |
| #5 | Search: (((((Internet[MeSH Terms])OR (Computers[MeSHTerms])) OR (Telemedicine[MeSH Terms])) OR (Telecommunications[MeSH Terms])) OR (Online Systems[MeSHTerms])) OR (Software[MeSH Terms]) | |
| #6 | Search: (((((((((Internet*[Title/Abstract]) OR (Web[Title/Abstract]))OR (Computer[Title/Abstract])) OR (technolog*[Title/Abstract])) OR (online[Title/Abstract])) OR (Electronic*[Title/Abstract])) OR (E-learning[Title/Abstract])) OR (mHealth[Title/Abstract])) OR (eHealth[Title/Abstract])) OR (cyberspace[Title/Abstract]) | |
| #7 | Search: (((Education[MeSH Terms]) OR (health education[MeSHTerms])) OR (cognitive therapy[MesH Terms])) OR(intervention[MeSH Terms]) | |
| #8 | Search: (((intervention*[Title/Abstract]) OR (program*[Title/Abstract])) OR (psychoeducation*[Title/Abstract])) OR(psychological[Title/Abstract]) | |
| #9 | Search: ((((((caregiv*[Title/Abstract]))OR (carer*[Title/Abstract]))OR (caring[Title/Abstract]))OR(caretaker[Title/Abstract]))OR (caregiver*[Title/Abstract]))OR(Caregivers[MeSH Terms]) | |
| #10 | Search: (dementia[MeSH Terms]) OR ((dement*[Title/Abstract] OR (alzheimer*[Title/Abstract])) | |
| #11 | Search: ((((((Internet[MeSH Terms]) OR (Computers[MeSHTerms])) OR (Telemedicine[MeSH Terms])) OR(Telecommunications[MeSH Terms])) OR (Online Systems[MeSHTerms])) OR (Software[MeSH Terms])) OR ((((((((((Internet*[Title/Abstract]) OR (Web[Title/Abstract])) OR(Computer[Title/Abstract])) OR (technolog*[Title/Abstract])) OR (online[Title/Abstract])) OR (Electronic*[Title/Abstract]))OR (E-learning[Title/Abstract])) OR (mHealth[Title/Abstract])) OR (eHealth[Title/Abstract])) OR (cyberspace[Title/Abstract])) | |
| #12 | Search: ((((Education[MeSH Terms]) OR (health education[MeSHTerms])) OR (cognitive therapy[MeSH Terms])) OR (intervention[MeSH Terms])) OR ((((intervention*[Title/Abstract]) OR (program*[Title/Abstract])) OR (psychoeducation*[Title/Abstract])) OR (psychological[Title/Abstract])) | |
| #13 | Search: ((((((((Randomized controlled trial[Publication Type]) OR (Controlled clinical trial[Publication Type])) OR (Randomized[Title/Abstract])) OR (Ramdomized[Title/Abstract]) OR (Randomised[Title/Abstract])) OR (Ramdomised[Title/Abstract])) OR (Randomly[Title/Abstract])) OR (Trial[Title/Abstract])) OR (Groups[Title/Abstract]) | |
| #14 | Search: (Controlled Before-After Studies[MeSH Terms]) OR (CBAstudiesiTitle/Abstract]) | |
| #15 | Search: ((((((((((Randomized controlled trial[Publication Type]) OR (Controlled clinical trial[Publication Type])) OR (Randomized[Title/Abstract])) OR (Ramdomized[Title/Abstract]) OR (Randomised[Title/Abstract])) OR (Ramdomised[Title/Abstract])) OR (Randomly[Title/Abstract]) OR (Trial[Title/Abstract])) OR (Groups[Title/Abstract])) OR (Controlled Before-After Studies[MeSH Terms])) OR (CBAStudies[Title/Abstract]) | |
| #16 | Search: (((((((((Randomized controlled trial[Publication Type]) OR (Controlled clinical trial[Publication Type]))OR(Randomized[Title/Abstract])) OR (Ramdomized[Title/Abstract])) OR (Randomised[Title/Abstract])) OR (Ramdomised[Title/Abstract])) OR (Randomly[Title/Abstract])) OR (Trial[Title/Abstract])) OR (Groups[Title/Abstract])) AND ((((((((((caregiv*[Title/Abstract])) OR (carer*[Title/Abstract])) OR (caring[Title/Abstract])) OR (caretaker[Title/Abstract])) OR (caregiver*[Title/Abstract])) OR (Caregivers[MesH Terms])) AND ((dementia[MeSH Terms]) OR ((dement*[Title/Abstract]) OR (alzheimer*[Title/Abstract])))) AND (((((((Internet[MeSH Terms]) OR (Computers[MesH Terms])) OR (Telemedicine[MesH Terms])) OR (Telecommunications[MeSH Terms])) OR (OnlineSystems[MeSH Terms])) OR (Software[MesH Terms])) OR ((((((((((Internet*[Title/Abstract]) OR (Web[Title/Abstract])) OR (Computer[Title/Abstract])) OR (technolog*[Title/Abstract])) OR (online[Title/Abstract])) OR (Electronic*[Title/Abstract])) OR (E-learning[Title/Abstract])) OR (mHealth[Title/Abstract])) OR (eHealth[Title/Abstract])) OR (cyberspace[Title/Abstract])))) AND (((((Education[MeSH Terms]) OR (health education[MeSHTerms])) OR (cognitive therapy[MeSH Terms])) OR (intervention[MesH Terms])) OR ((((intervention*[Title/Abstract]) OR (program*[Title/Abstract])) OR (psychoeducation*[Title/Abstract])) OR (psychological[Title/Abstract])))) | |
| #17 | Search: (((((((((((Randomized controlled trial[Publication Type]) OR (Controlled clinical trial[Publication Type])) OR (Randomized[Title/Abstract])) OR (Ramdomized[Title/Abstract])) OR (Randomised[Title/Abstract])) OR (Ramdomised[Title/Abstract])) OR (Randomly[Title/Abstract])) OR (Trial[Title/Abstract])) OR (Groups[Title/Abstract])) OR (Controlled Before-After Studies[MeSH Terms])) OR (CBAStudies[Title/Abstract])) AND ((((((((((caregiv*[Title/Abstract])) OR (carer*[Title/Abstract])) OR (caring[Title/Abstract])) OR (caretaker[Title/Abstract])) OR (caregiver*[Title/Abstract])) OR (Caregivers[MesH Terms])) AND ((dementia[MeSH Terms]) OR ((dement*[Title/Abstract]) OR (alzheimer*[Title/Abstract])))) AND (((((((Internet[MeSH Terms]) OR (Computers[MeSHTerms])) OR (Telemedicine[MeSH Terms])) OR (Telecommunications[MeSH Terms])) OR (Online Systems[MeSHTerms])) OR (Software[MesH Terms])) OR ((((((((((Internet*[Title/Abstract]) OR (Web[Title/Abstract])) OR (Computer[Title/Abstract])) OR (technolog*[Title/Abstract])) OR (online[Title/Abstract])) OR (Electronic*[Title/Abstract])) OR (E-learning[Title/Abstract])) OR (mHealth[Title/Abstract])) OR (eHealth[Title/Abstract])) OR (cyberspace[Title/Abstract])))) AND (((((Education[MeSH Terms]) OR (health education[MeSHTerms])) OR (cognitive therapy[MesH Terms])) OR (intervention[MeSH Terms])) OR ((((intervention*[Title/Abstract]) OR (program*[Title/Abstract])) OR (psychoeducation*ITitle/Abstract])) OR (psychological[Title/Abstract])))) | |
| 2.CINAHL | | |
| S1 | (MH "Caregivers") | |
| S2 | Tl ( caregiv* or carer" orcaring or caretaker orcaregiver* )OR AB( caregiv' or carer* or caring or caretaker or caregiver*) | |
| S3 | (MH "dementia") | |
| S4 | Tl ( dement* oralzheimer* )OR AB (dement* or alzheimer*) |
| S5 | (MH "internet") |
| S6 | (MH "telemedicine") |
| S7 | (MH "telecommunications") |
| S8 | (MH "online systems") |
| S9 | (MH "software") |
| S10 | Tl ( Internet* or Web*or Computer or technolog* oronline or Electronic* or E-learning or mHealth or eHealth or cyberspace) OR AB ( Internet* or Web* or Computer or technolog" or online or Electronic* or E.learning or mHealth or eHealth or cyberspace ) |
| S11 | (MH "education") |
| S12 | (MH "health education") |
| S13 | (MH "cognitive therapy") |
| S14 | Tl ( intervention* or program* or psychoeducation* or psychological ) OR AB (intervention* or program* or psychoeducation* or psychological ) |
| S15 | S1 OR S2 |
| S16 | S3 OR S4 |
| S17 | S5 OR S6 OR S7 OR S8 OR S9 OR S10 |
| S18 | S11 OR S12 OR S13 OR S14 |
| S19 | S15 AND S16 AND S17AND S18 |
| S20 | (MH "RandomizedControlled Trials+") |
| S21 | (MH "Clinical Trials+") |
| S22 | T1 ( random* or trial or groups ) OR AB ( random* or trial or groups ) |
| S23 | S20 OR S21 OR S22 |
| S24 | S19 AND S23 |
| S25 | LA english |
| S26 | (LA english) AND (S24 AND S25) |
| 3. **PsychINFO** | |
| S1 | MA Caregivers |
| S2 | Tl ( caregiv* or carer* or caring or caretaker or caregiver* ) OR AB ( caregivor carer" or caring or caretaker or caregiver*) |
| S3 | MA dementia |
| S4 | Tl ( dement* or alzheimer* ) OR AB ( dement* or alzheimer* ) |
| S5 | MA Internet |
| S6 | MA Computers |
| S7 | MA Telemedicine |
| S8 | MA Telecommunications |
| S9 | MA Online Systems |
| S10 | MA Software |
| S11 | Tl ( Internet* or Web* or Computer or technolog* or online or Electronic* or E-learning or mHealth or eHealth or cyberspace )OR AB ( Internet* or Web* or Computer or technolog* or online or Electronic* or E-earning or mHealth or eHealth or cyberspace ) |
| S12 | MA Education |
| S13 | MA health education |
| S14 | MA cognitive therapy |
| S15 | MA intervention |
| S16 | Tl( intervention* or program* or psychoeducation* or psychological ) OR AB( intervention* or program* or psychoeducation* or psychological ) |
| S17 | MA Randomized Controlled Trial |
| S18 | MA Controlled Clinical Trial |
| S19 | Tl ( random* or trial or groups ) OR AB ( random* or trial or groups ) |
| S20 | MA Controlled Before-After Studies) |
| S21 | TI CBA studies OR AB CBA studies |
| S22 | S1 OR S2 |
| S23 | S3 OR S4 |
| S24 | S5 OR S6 OR S7 OR S8 OR S9 OR S10 OR S11 |
| S25 | S12 OR S13 OR S14 OR S15 OR S16 |
| S26 | S17 OR S18 OR S19 OR S20 OR S21 |
| S27 | S22 AND S23 AND S24 AND S25 AND S26 |
| S28 | LA english |
| S29 | S27 AND S28 |
| 4. Web of Science | |
| #1 | ((((TS=(caregiv*)) OR TS=(carer*)) OR TS=(caring)) OR TS=(caretaker)) OR TS=(caregiver*) and Preprint Citation Index(Exclude-Database) |
| #2 | (TS=(dement*)) OR TS=(alzheimer*) and Preprint Citation Index (ExcludeDatabase) |
| #3 | (((((((((TS=(Internet*)) OR TS=(Web*)) OR TS=(Computer)) OR TS=(technolog*)) OR [TS=(online)) OR TS=(Electronic*)) OR TS=(E-learning)) OR TS=(mHealth)) OR TS(eHealth)) OR TS=(cyberspace) and Preprint Citation Index(Exclude- Database) |
| #4 | (((TS=(intervention*)) OR TS=(program*)) OR TS=(psychoeducation*)) OR TS=(psychological) and Preprint Citation Index(Exclude-Database) |
| #5 | #1 AND #2 AND #3 AND #4 and Preprint Citationindex(Exclude-Database) |
| #6 | ((((((((TS=(Randomized controlled trial)) OR TS=(Controlled clinical trial)) OR TS(Randomized)) OR TS=(Ramdomized)) OR TS=(Randomised)) OR TS=(Ramdomised)) OR TS=(Randomly)) OR TS=(Trial)) OR TS=(Groups) and Preprint Citation Index(Exclude-Database) |
| #7 | (TS=(Controlled Before-After Studies)) OR TS=(CBA studies) and Preprint citation Index (Exclude-Database) |
| #8 | #6 OR #8 and Preprint Citation Index (Exclude-Database) |
| #9 | #5 AND #9 and Preprint Citation Index(Exclude-Database) |
| #10 | #5 AND #9 and Preprint Citation Index (Exclude-Database) and English(Languages) |
| 5. EMBASE | |
| #1 | 'caregivers'/exp |
| #2 | caregiv*:ab,ti OR carer*:ab,ti OR caring:ab,ti ORcaretaker:ab,ti OR caregiver*:ab,ti |
| #3 | "dementia"/exp |
| #4 | dement*:ab,ti OR alzheimer*:ab,ti |
| #5 | "internet'/exp OR'computer'/exp OR "telemedicine'/exp OR "telecommunication'/exp OR 'online system"/exp OR 'software'/exp |
| #6 | internet*:ab.ti OR web*:ab,ti OR computer:ab,ti OR technolog*:ab,ti OR online:ab,ti ORelectronic*:ab,ti OR 'e learning':ab,ti OR mhealth:ab.ti OR ehealth:ab.ti OR cyberspace:ab.ti |
| #7 | 'education'/exp OR "health education'/exp OR cognitive therapy"/exp OR "intervention'/exp |
| #8 | intervention*:ab,ti OR program*:ab,ti OR psychoeducation*:ab,ti OR psychological:ti,ab |
| #9 | #1 OR #2 |
| #10 | #3 AND #4 |
| #11 | #5 AND #6 |
| #12 | #7 AND #8 |
| #13 | #9 AND #10 AND #11 AND #12 |
| #14 | 'randomized controlled trial/exp OR 'controlledclinical trial'/exp |
| #15 | random*:ab,ti OR trial:ab,ti OR groups:ab,ti |
| #16 | 'controlled before-after studies'/exp |
| #17 | #14 OR #15 OR #16 |
| #18 | #13 AND #17 |

**Supplementary Table 2: Included articles in this review (n=41)**

| Study | Sample size | Intervention and conditions | | | | | | theory | Compliance management |
| --- | --- | --- | --- | --- | --- | --- | --- | --- | --- |
| Intervention content | Delivery | Assessment timepoints | Intervention Duration | Outcome index | Outcome |
| Atefi et al.,2025 (85) | IG=30 | 1356 | Website | Baseline  9 weeks  12 weeks  24 weeks | 9W | - depression, anxiety, and stress- DASS-21 - competence- SSCQ - burden- one-item perseverance-time questionnaire | having significant impacts | N/A | No |
| Kagwa et al.,2025 (86) | IG=35/46 | 135 | APP | Baseline  8 weeks | 8W | - Burden- The Zarit Burden Interview (ZBI) (short version) - Depression- PHQ-9 | There were no significant differences | N/A | No |
| Morgan et al.,2025 (87) | IG=24/34 | 1256 | APP | Baseline  4 weeks  8 weeks | 8W | - Acceptance- participant engagement - Depression- CES-D-10 - Anxiety- GAD-7 - Burden- The Zarit Burden Interview (ZBI) (short version) - PAC-RS-14 | iSupport RDC was acceptable | Normalization Process Theory (NPT) | No |
| Nguyen et al.,2025 (38) | IG=30 GG=30 | 12356 | APP | Baseline  7 weeks  12 weeks | 12W | - Feasibility- investigator created scale - Acceptance- investigator created scale - Satisfaction- investigator created scale - depression, anxiety, and stress- DASS-21 - burden (4-item Zarit scale) - quality of life-SF-36 - social support-MSPSS | 90% retention). Assessment completion rates were 96.7% immediately after the intervention and 93.1% at the 3-month follow-up. Over 85% of participants were engaged weekly. Acceptability was high, with more than 89% expressing satisfaction with the content, format, and duration. Preliminary findings indicated improvements in psychological distress, dementia knowledge, caregiver burden, and quality of life. | the Roy Adaptation Model  the Theory of Caregiver Stress | NO |
| Thompson et al.,2025 (88) | IG=163 | 6 | APP | Baseline  4 weeks  8 weeks  12 weeks  16 weeks  20 weeks | 20W | - Feasibility- investigator created scale - Acceptance- investigator created scale - anxiety-PROMIS - depression- PROMIS - burden-Zarit Burden Inventory-Short Form | Having good feasibility and acceptability | NIA Stage Model of Behavioral Intervention  Development  elective  optimization with compensation” (SOC) theory | NO |
| Yuan et al.,2025 (89) | IG=51/60 GG=55/60 | 156 | Website | baseline 20 weeks | 20W | - Burden- The Zarit Burden Interview (ZBI) (24- version) - Quality of life-CG-QOL - Social Support- Social Support Rating Scale ( 10-item) | There were no significant differences | N/A | NO |
| Windle et al.,2025 (90) | IG=123/175 GG=133/177 | 156 | Website | baseline 12 weeks 24 weeks | 24W | - Burden- The Zarit Burden Interview (ZBI) (short version) - Depression-CES-D-10 - PAC-RS-14 - Anxiety-GAD-7 - quality of the caregiving relationship-QCPR-14 - Quality of life- DEMQOL-Proxy | There were no significant differences | N/A | YES |
| Dupont et al.,2024 (34) | IG=31/31 | 123456 | Website | baseline 8 weeks | 8W | - Usability-System Usability Scale + Qualitative interview - Acceptance-Qualitative interview - Feasibility-Qualitative interview | 1-the Burden Scale for Family Caregiving (BSFC)- No significant change  changes in coping style and emotional well-being-the Brief-COPE instrument- No significant change Well-Being-the World Health Organization (WHO)-5 Well-Being Scale- Significant increase | N/A | NO |
| Atefi et al., 2024 (91) | IG=24/30 | 123456 | Website | baseline  pre-post intervention  12 weeks  24 weeks | 12W | - Usability-investigator created scale | N/A | Ottawa Decision Support Framework (ODSF; | YES |
| McCrae et al., 2023 (92) | IG=5 | 156 | App | N/A |  | - depression- BDI-II anxiety-STAI - burden-Zarit Burden Inventory-Short Form - stress-Perceived Stress Scale - Quality of life-CG-QOL | N/A | N/A | NO |
| Wei et al., 2023 (93) | IG=23/23 | 156 | Website | baseline  2 weeks | 2W | - depression, anxiety, and stress- The 21-item Depression Anxiety and Stress Scale (DASS-21) - Burden- The Zarit Burden Interview (ZBI) (short version) | With the increase of social networks, the pain of neuropsychiatric symptoms was significantly reduced in the moderate group ( p = 0.013), the nursing self-efficacy of controlling disturbing thoughts was enhanced, and loneliness was reduced | N/A | YES |
| Blackberry et al., 2023 (46) | IG=113 | 123456 | Website | baseline -  8-weekly 32 weeks | 8W | - Burden- The Zarit Burden Interview (ZBI) - social support- MOS-SSS | MOS-SSS increased over 32 weeks (p = 0.003) and caregiver demand for care (ZBI) decreased slightly | N/A | NO |
| Hong et al., 2023 (43) | IG=23/24 | 123456 | Website | baseline 7 weeks | 7W | - Feasibility-Qualitative interview - Acceptability-Qualitative interview - burden -the Zarit Burden Interview (ZBI). - Depression -the Center for Epidemiologic Depression Scale (CES-D) - Usability-Qualitative interview - Feasibility-Qualitative interview | High user satisfaction and perceived usefulness of the intervention as well as high ratings for weekly programs. The intervention resulted in significant improvements in participants' mental health outcomes; Their depressive symptoms decreased from 5.74 to 3.35 with an effect size of -0.89 and their care burden decreased from 25.78 to 21.96 with an effect size of -0.48. | N/A | YES |
| Rodriguez et al., 2023 (94) | IG=23/26 GG=22/27 | 13456 | Website | baseline 12 weeks  24 weeks | 24W | - usability- the Simplified System Usability Scale (SUS) - acceptance-the Behavioral Intention Questionnaire-BCN acceptance | N/A | N/A | NO |
| Kwok et al., 2023 (95) | IG=10/15 | 256 | Website | baseline 3 weeks 6 weeks | 6W | - Usability-System Usability Scale, - Usefulness-Perceived System Usefulness scale - Feasibility-investigator created scale - Acceptance-investigator created scale - depression-PROMIS - anxiety-PROMIS - burden-OCBS - stress-Cohen Perceived Stress Scale - PAC-positive aspect of caregiver scale | Perceived System Usefulness scale - Good Feasibility - average percentage of pages viewed in total pages, 72% Qualitative: 1. Add a case how to use it in a stressful situation 2. Email prompts are combined with the content of this week's course to increase the sense of connection between participants and professionals 3. There is a situation where the textbook video has not been watched | N/A | YES |
| Daemen et al., 2022 (49) | IG=10/19 | 13456 | Website | N/A | N/A | - Acceptance-Technology Acceptance Model (TAM)‘s four subscales - Usability -investigator created scale - Satisfaction-investigator created scale | N/A | N/A | NO |
| Hepburn et al., 2022 (37) | IG=22/30 | 12356 | Website | baseline  2 weeks after program completion | N/A | - Burden-Zarit Burden Inventory-Short Form - Anxiety--Trait Anxiety Inventory (STA-I） - Depression-The Center for Epidemiological Studies-Depression scale, short form - Caregiving Competence-Pearlin’s Mastery scale | In terms of depression, perceived stress, responses to the behavior of the caregiver, and the improvement of the caregiver's mastery ability No expected benefit in terms of caregiver burden and anxiety was found. | Medical Research Council | NO |
| Teles et al., 2022 (14) | IG=11/21 GG=20/21 | 156 | Website | baseline  12 weeks 24 weeks | 12W | - burden-ZBI Zarit Burden Interview - anxiety-HADS-A Hospital Anxiety and Depression Scale (anxiety subscale) - depression-HADS-D Hospital Anxiety and Depression Scale (depression subscale) - PAC- Positive Aspects of Caregiving - Usability-Qualitative interview | Anxiety had a significant between-group effect | N/A | YES |
| Kozlov et al., 2022 (96) | IG=59/61 | 56 | Website | baseline  2 weeks  4 weeks  8 weeks | 8W | - Anxiety - Hospital Anxiety and Depression Scale anxiety subscale (HADS-A) a - depression- depression subscale (HADS-D). - Stress- the Perceived Stress Scale (Cohen et al., 1983) - burden- the Bakas Caregiving Outcomes Scale - Satisfaction- investigator created scale | having significant impacts | N/A | NO |
| Han et al., 2022 (97) | IG=159/159 | 12456 | Website | baseline  12-24 weeks | N/A | - self-efficacy -Self-Efficacy Questionnaire for Chinese Family Caregivers (SEQCFC) - distress caused by responsive behaviours -Neuropsychiatric Inventory – Questionnaire (NPI-Q) - burden-Zarit Burden Interview (ZBI) - depression-Center for Epidemiologic Studies Depression Scale (CES-D10)), - perceived stress (Perceived Stress Scale of Chinese version (PSS-C)) - helplessness (Learned Helplessness Scale) - Usability-investigator created scale | There were statistically significant differences in depression, perceived stress, helplessness, total self-efficacy scores, and information collection and support. Pain and caregiver burden were not statistically significant | N/A | NO |
| Zaslavsky et al., 2022 (98) | IG=12/15 | 12456 | Website | baseline  8 weeks | 8W | - Depressive- the Center for Epidemiologic Studies Depression (CES-D) Scale - Burden- 22-item version of the Zarit Caregiver Burden Interview - Stress- the Perceived Stress Scale - Usability-Qualitative interview | Depression, loneliness, burden, and stress improved | N/A | YES |
| Boutilier et al., 2022 (99) | IG=46/51 | 1356 | Website | beseline 8 weeks | 8W | - Acceptability -the System Usability Scale (SUS)+Qualitative interview | N/A | N/A | YES |
| Goodridge et al., 2021 (47) | IG=29/53 | 12456 | App | baseline  1 week after the program | 12W | - Satisfaction-Qualitative interview - Acceptance-Qualitative interview - burden-the Burden Scale for Family Caregiving (BSFC) - brief-changes in coping style and emotional well-being - Brief-COPE instrument - Well-Being-the World Health Organization (WHO)-5 Well-Being Scale | N/A | N/A | NO |
| Su et al., 2021 (100) | IG=70/70 GG=70/70 | 123456 | Website | Baseline  end of the 12-week intervention  12 weeks after the end of the intervention | 12W | - Competence-Sense of Competence in Dementia Care Staff scale (SCIDS) | Significantly improved the knowledge, attitudes and competencies of home caregivers about dementia care | Social Cognition and Stress and Coping Theory | YES |
| Baruah et al., 2021 (65) | IG=29/74 GG=26/77 | 156 | Website | baseline 12 weeks | 12W | - Feasibility--investigator created - Burden-ZBI - Self‐efficacy:the RIS Eldercare Self‐efficacy Scale. - Mastery-Mastery Scale - Self‐rated health: the EuroQol — Visual Analog Scale. | There were no significant differences | N/A | NO |
| Park et al., 2020 (101) | IG=12/13 GG=12/13 | 12 | App | Baseline  immediately after the termination of the program  2 weeks after the termination of the program | N/A | - Stress-saliva cortisol levels - Fatigue-the Revised Piper Fatigue Scale - Burden-using the Burden Inventory developed by Zarit, Reever, and BachPeterson (1980) and translated and revised by Kwon (1996) | Improves fatigue and burden on family caregivers | DICE™ | YES |
| Meichsner et al., 2019 (44) | IG=13/19 GG=14/18 | 13456 | Website | baseline 8weeks  20weeks | 8W | - depression-the German version of the Center for Epidemiologic Studies Depression Scale (CES‐D） - grief-The Caregiver Grief Scale (CGS） - Burden- visual analog scale - Acceptance-the Client Satisfaction Questionnaire (CSQ-8) | Depression and care burden have no therapeutic effect | Web-based flowchart  MRC | YES |
| Sikder et al., 2019 (45) | IG=17 | 5 | App | baseline  4 weeks | 4W | - Depression- 16-item Quick Inventory of Depressive Symptoms–Self-Rated (QIDS) - Usability-Qualitative interview | There was an improvement in depressive symptoms and an increase in positive mood after the intervention | N/A | NO |
| Gustafson et al., 2019 (3) | IG=14/16 GG=11/15 | 123456 | Website | baseline  8 weeks 12 weeks  24 weeks | 24W | - burden -caregiver load scale - Loneliness -the UCLA Loneliness Scale - Anxiety -The Generalized Anxiety Disorder scale - Depression -the eight-item version of the Patient Health Questionnaire | better performance in social support, anxiety, loneliness, and coping skills; There were no significant differences in caregiver burden, decision-making satisfaction, and depression | N/A | NO |
| Williams et al., 2019 (73) | IG=42/50 GG=41/56 | 13456 | Website | baseline  4 weeks  12 weeks | 12W | - burden-Zarit Burden Interview-Short (Bedard et al., 2001). - Confidence-Adapted Caregiver Target Problems Questionnaire - depressio- CES-D - Satisfaction-自制 | Depression was reduced, ability improved, and there were no other significant changes | N/A | NO |
| Kales et al., 2018 (42) | IG=27/27 | 146 | Website | baseline  One month after baseline | 4W | - caregiver distress -distress items from a revised version of the NPI-Q - stress-CES-D - burden-Zarit burden scale  negative communication -Negative Communication Scale - relationship closeness-Relationship Closeness Scale | Significant within-group improvements were shown in distress and behaviour frequency, severity, and overall behaviour scores The degree of improvement in distress was greater, and there were no significant differences between the two groups in terms of caregiver confidence or other secondary outcomes | Bandura's Theory on Self-Efficacy | YES |
| Boots et al., 2018 (40) | IG=31/41 GG=37/40 | 56 | Website | baseline 8 weeks | 8W | - effectiveness-Caregiver Self-Efficacy Scale (CSES) - depression and anxiety- The Hospital and Anxiety Depression Scale (HADS) - mastery -7-item Pearlin Mastery Scale (PMS) - psychological complaints (anxiety and perceived stress),- The 7-item Hospital and Anxiety Depression Scale-Anxiety (HADS-A) - quality of life -the Investigating Choice Experiments for the Preferences of Older People CAPability measure for Older people (ICECAP-O) | The intervention group showed significant advantages in terms of self-efficacy, control, and quality of life. There were no significant differences between the two groups in terms of depressive symptoms, anxiety, and perceived stress | User-centric | YES |
| Duggleby et al., 2018a (41) | IG=37/70 | 135 | Website | baseline  4 weeks  8 weeks | 8W | - Hope: Measured by the Herth Hope Index (HHI). General - Self-Efficacy: Measured by the General Self-Efficacy Scale (GSES). - Health-Related Quality of Life (HRQoL): Measured by the 12-item Short-Form Health Survey (SF-12v2). Loss and Grief: Measured by the Non-Death Revised - Grief Experience Inventory (NDRGEI) - Usability-investigator created scale +Qualitative interview | MT4C-In Care is easy to use, feasible, and acceptable. , hope score increases significantly over time, and sadness decreases significantly). There were no significant differences in mental health, | Meleis's Theory of Transition | NO |
| Duggleby et al., 2018b (102) | IG=73/101 GG=81/98 | 156 | Website | baseline  4 weeks  12 weeks  24 weeks | 12W | - Hope: Measured by the Herth Hope Index (HHI). General - Self-Efficacy:Measured by the General Self-Efficacy Scale (GSES). - Loss and Grief:Measured by the Non-Death Revised Grief Experience Inventory (NDRGEI). - Health-Related Quality of Life (HRQoL):Measured by the 12-item Short-Form Health Survey (SF-12v2). - Usability-Qualitative interview | It was hoped that there would be a significant difference in the score, and that there would be no significant difference in the other scores | Meleis's Theory of Transition | YES |
| Núñez-Naveira et al., 2016 (103) | IG=41/31 GG=36 /30 | 156 | Website | baseline  12 weeks | 12W | - Feasibility-investigator created scale - Depression- the Center for Epidemiologic Studies Depression Scale (CES-D) | Caregivers in the experimental group had significantly fewer depressive symptoms, but their sense of competence and satisfaction with the care experience may also have improved. low satisfaction scores, | N/A | NO |
| Gaugler et al., 2016 (39) | IG=30 | 13456 | Website | N/A | N/A | - Usability-investigator created scale - Acceptance-modified Decisional Acceptability scale | N/A | N/A | NO |
| Cristancho-Lacroix et al., 2015 (81) | IG=17/25 GG=17/24 | 123456 | Website | Baseline  12 weeks | 12W | - stress- PSS-14 self-efficacy -the Revised Scale for Caregiving Self-Efficacy (RSCS) - burden -the French version of the Zarit Burden Interview - perceived health status -the French version of the Nottingham Health Profile (NHP) - depression -the second version of the Beck Depression Inventory (BDI-II) - Usability-investigator created scale+Qualitative interview | There was no significant effect | N/A | YES |
| Blom et al., 2015 (48) | IG=90/149 GG=85/96 | 6 | Website | baseline  half of the lessonlast lesson | N/A | - depression-the Center for Epidemiologic Studies Depression Scale (20 itemsCES-D) - anxiety- the Hospital Anxiety and Depression Scale(7 items) - distress- the Self-Perceived Pressure from Informal Care scale(9 items) | Significantly reduced depressive symptoms (p = .034) and anxiety | N/A | YES |
| Hattink et al., 2015 (36) | IG=26/85 | 1256 | Website | N/A | N/A | - Usability-investigator created scale - Quality of life:Measured by two distinct questions. - Burden:Measured by one question. - Sense of competence: Measured by the Short Sense of Competence Questionnaire (SSCQ). | STAR has received positive reviews from all user groups in terms of practicality and user-friendliness. Both person-centred care and positive attitudes towards dementia had a significant effect; Scores improved in both the experimental and control groups. Regarding empathy, the STAR training group showed significant improvements in distress, empathetic care, and putting themselves in the perspective of people with dementia. However, the experimental group had a significantly lower sense of self-reported ability. | Medical models of dementia  Adaptation-coping model, | NO |
| Kajiyama et al., 2013 (104) | IG=46/75 GG=57/75 | 156 | Website | baseline  12 weeks | 12W | - Stress- The 10-item Perceived Stress Scale - Depressive- the Center for Epidemiological Studies Depression scale | The perceived stress was obvious in the intervention group, but the changes in other indicators were not significant | N/A | YES |
| Finkel et al., 2007 (105) | IG= 13/17 GG=12/19 | 1256 | Website | N/A | N/A | - Depression-the Centers for Epidemiologic Studies Depression Scale (CES-D) - Burden-The 24-item Revised Memory and Behavior Problems Checklist (RMBPC) - Caregivers’ health care behaviors-nine-item modified version of the Caregiver Health and Health Behaviors scale - social support-A Received Social Support scale - Satisfaction-investigator created scale | Significant reduction in burden and significant reduction in depression among caregivers with high depression | Kale's theoretical framework of reasons and management of BPSD | NO |

NA: Key characteristics not mentioned in the study; W: weeks; Intervention content (1- Provide information and guidance on caregiving skills; 2- Peer Support; 3- Contact a professional; 4- Decision Support; 5- Psychological Support; 6- Self-care guidance)
